# Supplementary material
Source: Springer Nature journal article supplement (https://www.springermedizin.de/resource/supplementary/12889_2010_2663_MOESM2_ESM.pdf/9486970)

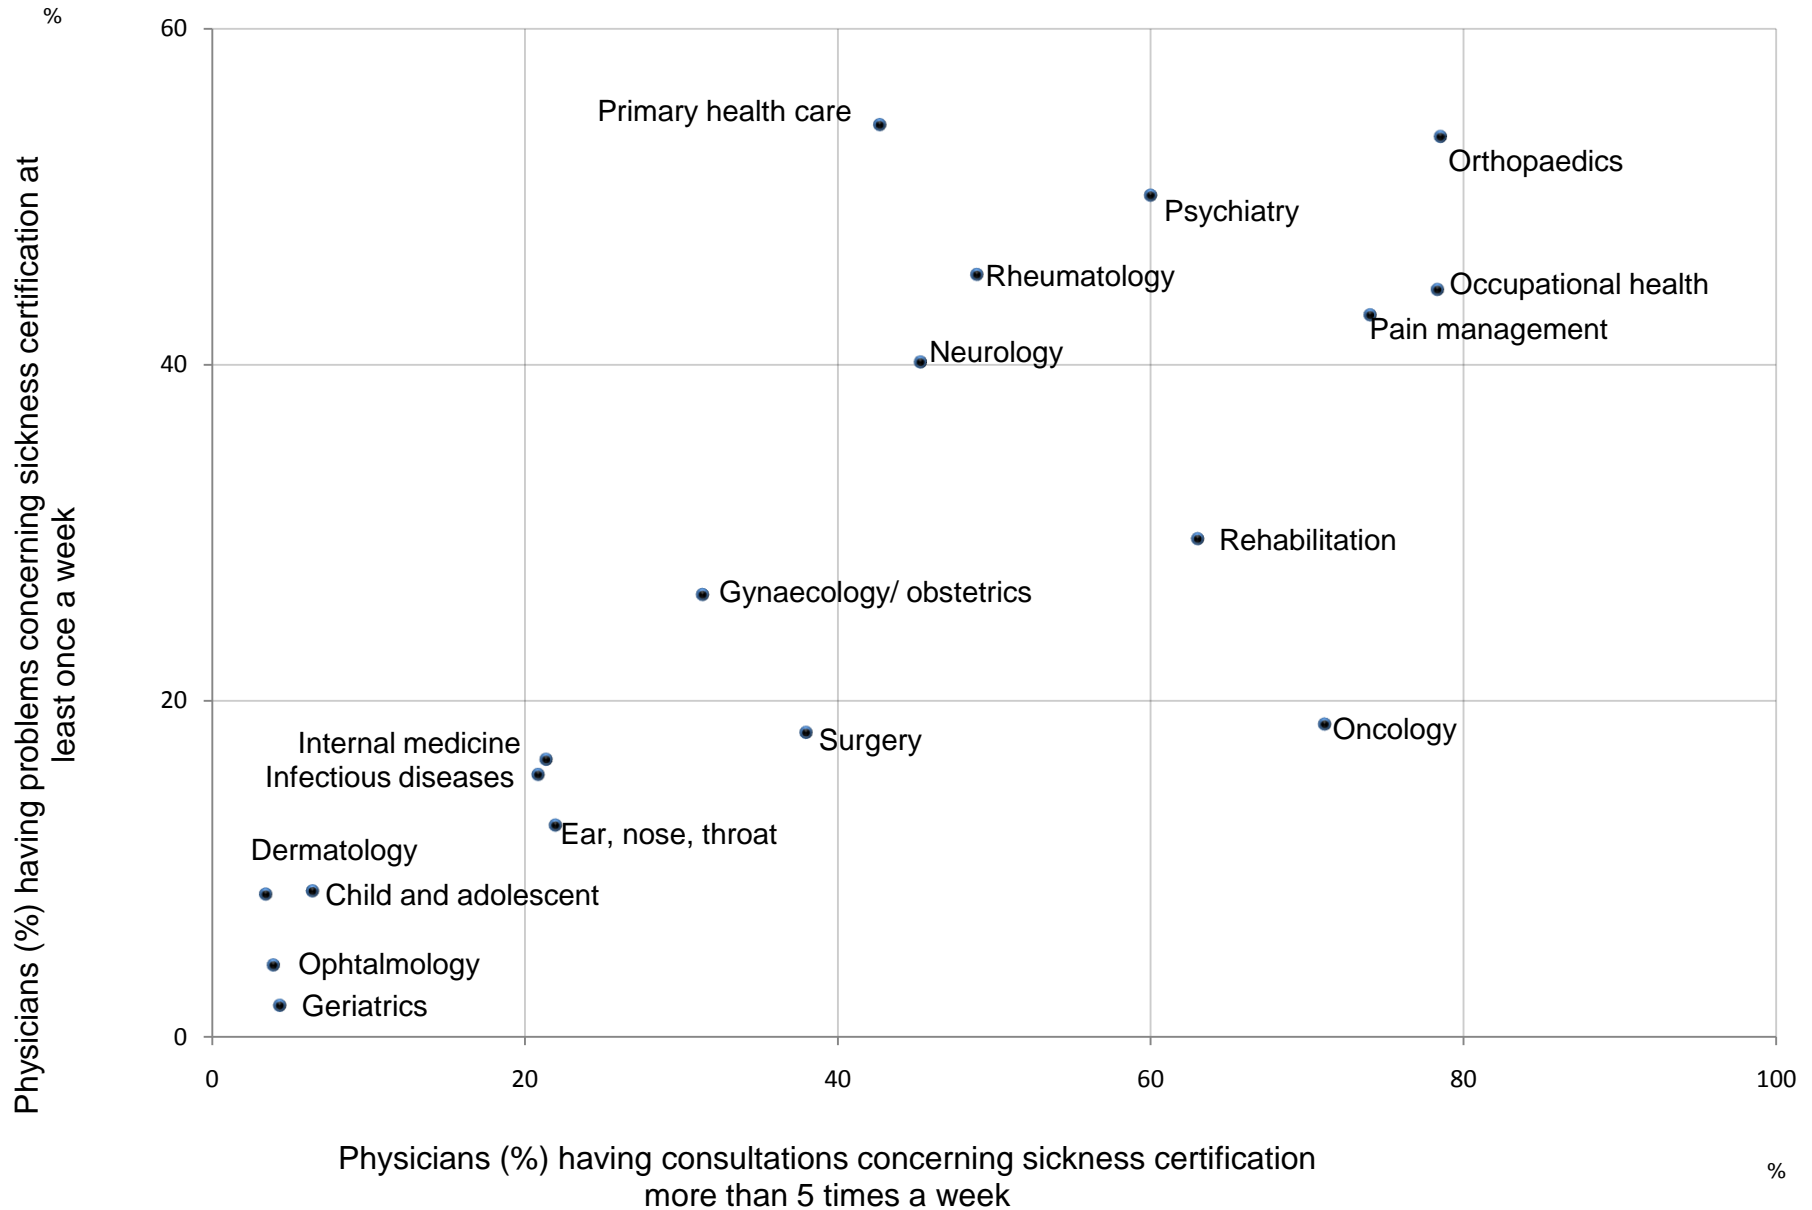

Supplement: MOESM2 [file 9486970]
